# Supplementary material for: Bacterial sensing: A putative amphipathic helix in RsiV is the switch for activating σV in response to lysozyme
Source: PubMed Central journal article supplement (PMC6066255; doi:10.1371/journal.pgen.1007527), 2018-07-18
Supplement: pgen.1007527.s008.pdf [file pgen.1007527.s008.pdf]

**Table S1: Oligonucleotides**

| <b>Primer</b>            | <b>Sequence 5' to 3'</b>                                     | <b>Description of use</b> |
|--------------------------|--------------------------------------------------------------|---------------------------|
| CDEP3533                 | aaaactgctgccttcggatcgggaaaaatctcatccagt                      | sigVrsiV pDG1664 For      |
| CDEP3534                 | aactttagggttatcgaattttatgatggatgtttttatctgaa                 | sigVrsiV pDG1664 Rev      |
| CDEP3194                 | gtgagcggataacaattaagcctaaggaggctttcttaatggataagagattacagca   | RsiV pDR For              |
| CDEP3865                 | aacaattaagcctaaggaggctttcttaatggataagagattacagc              | RsiV pDR For              |
| CDEP3195                 | ccgaattagcttgcctgctatctttatcgaataaacgttctcc                  | RsiV pDR Rev              |
| CDEP3868                 | ccaccgaattagcttgcctgctggtacctttgtagagctcat                   | GFP Outside Rev           |
| CDEP3165                 | cggagctcgaattcggatccatctttatcgaataaacgttctccc                | N term 6xHis pET21 For    |
| CDEP3267                 | ttaagaaggagatatacatatgcaccatcaccatcaccatattggataagagattacagc | RsiV pET21 Rev            |
| CDEP3629                 | gtgagcggataacaattaagcctaaggaggctttcttaatgcaccatcaccatcaccat  | 6xHis RsiV pDR For        |
| <i>rsiV</i> 1-66-GFP For | ccggacgccgctcaggctatgagcaaaaggagaagaact                      | pLL197                    |
| <i>rsiV</i> 1-76-GFP For | cctgtcatcggcaaatcatgagcaaaaggagaagaact                       | pLL194                    |
| <i>rsiV</i> 1-86-GFP For | acctttattgaaatcaaatgagcaaaaggagaagaact                       | pLL195                    |
| <i>rsiV</i> 1-96-GFP For | caatcaagcattgatgtcatgagcaaaaggagaagaact                      | pLL196                    |
| <i>rsiV</i> 1-66-GFP Rev | agttcttctctttgctcatagcctgagcggcgctccgg                       | pLL197                    |
| <i>rsiV</i> 1-76-GFP Rev | agttcttctctttgctcatgattttgccgatgacagg                        | pLL194                    |
| <i>rsiV</i> 1-86-GFP Rev | agttcttctctttgctcattttgatttcaataaaggt                        | pLL195                    |
| <i>rsiV</i> 1-96-GFP Rev | agttcttctctttgctcatgacatcaatgcttgattg                        | pLL196                    |
| <i>rsiV</i> Δ67-76 For   | ccggacgccgctcaggctgtcaaaagcgtacaccttt                        | pLL208, pLL212            |
| <i>rsiV</i> Δ67-86 For   | ccggacgccgctcaggctgagcaaaagaccaatca                          | pLL209, pLL213            |
| <i>rsiV</i> Δ67-76 Rev   | aaaggtgatcgtttgacagcctgagcggcgctccgg                         | pLL208, pLL212            |
| <i>rsiV</i> Δ67-86 Rev   | tgattggtcttttctcagcctgagcggcgctccgg                          | pLL209, pLL213            |
| I73K For                 | atgtcaaaagatccctgtcaaggggcaaaatcgtcaaaagc                    | pLL201                    |
| I76K For                 | atccctgtcatcggcaaaaaggtcaaaagcgtacaccttt                     | pLL140                    |
| I80K For                 | ggcaaaatcgtcaaaagcgaagacctttattgaaatcaaa                     | pLL141                    |
| M67K For                 | ccggacgccgctcaggctaaagcgaagatccctgtcatc                      | pLL198                    |
| I73K Rev                 | cgctttgacgattttgcacctgacagggatctttgacat                      | pLL201                    |
| I76K Rev                 | aaaggtgatcgtttgacctttttgccgatgacagggat                       | pLL140                    |
| I80K Rev                 | tttgattcaataaaggtcttcgctttgacgattttgcc                       | pLL141                    |
| M67K Rev                 | gatgacagggatctttgacttagcctgagcggcgctccgg                     | pLL198                    |
| A66W For                 | atcaaccggagcgc gct cag tgg atgtcaaaagatccct                  | pLL158                    |
| Q65C A66W For            | aatatcaaccggagcgcgcttgc gct atgtcaaaagatccc                  | pLL159                    |
| A66W M67C For            | ccggacgccgctcagtggtgttcaaaagatccctgtcatc                     | pLL185                    |
| A66W K69C For            | gctcagtgatgtcatgtatccctgtcatcggcaaa                          | pLL202                    |
| A66W I70C For            | gctcagtgatgtcaaaagtcctgtcatcggcaaaatc                        | pLL182                    |
| A66W V72C For            | tggatgtcaaaagatccctgtatcggcaaaatcgtcaaa                      | pLL203                    |
| I73C For                 | atgtcaaaagatccctgtctgcgcaaaatcgtcaaaagc                      | pLL165, pLL205            |
| I76C For                 | atccctgtcatcggcaaatcgtcaaaagcgtacaccttt                      | pLL167, pLL153            |
| K78C For                 | gtcatcggcaaaatcgtctgtgcgtacacctttattgaa                      | pLL179, pLL206            |
| I80C For                 | ggcaaaatcgtcaaaagcgtgtacctttattgaaatcaaa                     | pLL193, pLL207            |
| F82C For                 | atcgtcaaaagcgtacacctgtattgaaatcaaaagagaa                     | pLL184, pLL220            |
| E84C For                 | aaagcgtacacctttattgtcatcaaaagaggaaaaagac                     | pLL168, pLL155            |
| A167C For                | ccggcgcaatattgaacaacacaatgctcttctacacacaaagccg               | pLL169                    |
| A66W Rev                 | agggatctttgacatccactgagcggcgctccgggttgat                     | pLL158                    |
| Q65C A66W Rev            | gggatctttgacatagcgaagcggcgctccgggttgatatt                    | pLL159                    |
| A66W M67C Rev            | gatgacagggatctttgaacacctgagcggcgctccgg                       | pLL185                    |
| A66W K69C Rev            | tttgccgatgacagggatacatgatccactgagc                           | pLL202                    |
| A66W I70C Rev            | gattttgccgatgacagggacacctttgacatccactgagc                    | pLL182                    |

|               |                                               |                |
|---------------|-----------------------------------------------|----------------|
| A66W V72C Rev | tttgacgattttgccgatacaagggatctttgacatcca       | pLL203         |
| I73C Rev      | cgctttgacgattttgccgcagacagggatctttgacat       | pLL165, pLL205 |
| I76C Rev      | aaaggtgatcgccttgacgcatttccgatgacagggat        | pLL167, pLL153 |
| K78C Rev      | ttcaataaaggtgatcgcacagacgattttgccgatgac       | pLL179, pLL206 |
| I80C Rev      | tttgattcaataaaggtacacgctttgacgattttgcc        | pLL193, pLL207 |
| F82C Rev      | ttcctcttgatttcaatacaggtgatcgcctttgacgat       | pLL184, pLL220 |
| E84C Rev      | gtcttttctctttgatgcaataaaggtgatcgccttt         | pLL168, pLL155 |
| A167C Rev     | cggctttgtgttaggaagagcattgtgttttcaatattgcgccgg | pLL169         |
| I76C I80K For | ggcaaatgcgtcaaagcgaagaccttattgaaatcaaaa       | pLL223         |
| I76C I80K Rev | tttgattcaataaaggtcttcgctttgacgcattttgcc       | pLL223         |
| Q65C For      | aatatcaaccggagccgcttgc gct atgtcaagatccc      | pLL215         |
| M67C For      | ccggagcccgtcaggcttgttcaagatccctgtcatc         | pLL216         |
| K69C For      | gccgctcaggctatgtcatgtatccctgtcatcgcaaaa       | pLL217         |
| I70C For      | gctcaggctatgtcaaagtgcctgtcatcgcaaaaatc        | pLL218         |
| V72C For      | gctatgtcaagatcccttgtatcgcaaaaatcgtaaaa        | pLL219         |
| Q65C Rev      | gggatctttgacatagcgcaagcggcgtccgggtgatatt      | pLL215         |
| M67C Rev      | gatgacagggatctttgaacaagcctgagcggcgtccgg       | pLL216         |
| K69C Rev      | tttgccgatgacagggatacatgacatagcctgagcggc       | pLL217         |
| I70C Rev      | gattttgccgatgacaggacattttgacatagcctgagc       | pLL218         |
| V72C Rev      | tttgacgattttgccgatacaagggatctttgacatagc       | pLL219         |
